# Supplementary material
Source: ML conference proceedings conference paper supplement (https://openreview.net/forum?id=ZulWEWQOp9)
Supplement: supplementary_material [file attachment]

## Ctrl-X dataset sources and licenses

We list all non-generated images used in our paper here.

| Image/video                                                                         | Source and license                                                                                                                                                                                                                                                                                                                                                                                                                                                               |
|-------------------------------------------------------------------------------------|----------------------------------------------------------------------------------------------------------------------------------------------------------------------------------------------------------------------------------------------------------------------------------------------------------------------------------------------------------------------------------------------------------------------------------------------------------------------------------|
|    | Link:<br><a href="https://en.wikipedia.org/wiki/White_tiger#/media/File:Standing_white_tiger.jpg">https://en.wikipedia.org/wiki/White_tiger#/media/File:Standing_white_tiger.jpg</a><br>License: CC BY-SA 4.0<br>Credit: Basile Morin                                                                                                                                                                                                                                            |
|    | Link:<br><a href="https://openaccess.thecvf.com/content/CVPR2023/papers/Avrahami_SpaText_Spatio-Textual_Representation_for_Controllable_Image_Generation_CVPR_2023_paper.pdf">https://openaccess.thecvf.com/content/CVPR2023/papers/Avrahami_SpaText_Spatio-Textual_Representation_for_Controllable_Image_Generation_CVPR_2023_paper.pdf</a><br>Credit: Academic Paper: SpaText: Spatio-Textual Representation for Controllable Image Generation<br>License: No explicit license |
|   | Painting by Van Gogh<br>License: Public Domain                                                                                                                                                                                                                                                                                                                                                                                                                                   |
|  | Link:<br><a href="https://free3d.com/3d-model/bugatti-chiron-2016-4387.html">https://free3d.com/3d-model/bugatti-chiron-2016-4387.html</a><br>License: Royalty Free License<br>Credit: TAURUS3D                                                                                                                                                                                                                                                                                  |
|  | Link:<br><a href="https://free3d.com/3d-model/hunting-cat-paper-8845.html">https://free3d.com/3d-model/hunting-cat-paper-8845.html</a><br>License: Royalty Free License<br>Credit: unry                                                                                                                                                                                                                                                                                          |

|                                                                                     |                                                                                                                                                                                                                                                                                                                                                                                |
|-------------------------------------------------------------------------------------|--------------------------------------------------------------------------------------------------------------------------------------------------------------------------------------------------------------------------------------------------------------------------------------------------------------------------------------------------------------------------------|
|    | <p>Link: <a href="https://aspentreeanimalcare.com/new-client-form/">https://aspentreeanimalcare.com/new-client-form/</a><br/> License: Not Listed<br/> Credit: Not Listed</p>                                                                                                                                                                                                  |
|    | <p>Link: <a href="https://depositphotos.com/vector/city-street-linear-perspective-sketch-road-view-cars-end-buildings-hand-drawn-vector-stock-line-177335574.html">https://depositphotos.com/vector/city-street-linear-perspective-sketch-road-view-cars-end-buildings-hand-drawn-vector-stock-line-177335574.html</a><br/> License: Royalty Free<br/> Credit: Ilyakalinin</p> |
|    | <p>Link: <a href="https://shop.bitgem3d.com/products/low-poly-base-mesh-dog">https://shop.bitgem3d.com/products/low-poly-base-mesh-dog</a><br/> License: <a href="#">royalty free</a><br/> Credit: Not Listed</p>                                                                                                                                                              |
|  | <p>Link: <a href="https://arxiv.org/abs/2005.11084">https://arxiv.org/abs/2005.11084</a><br/> Credit: Academic Paper: Point2Mesh: A Self-Prior for Deformable Meshes<br/> License: <a href="https://github.com/ranahanocka/point2mesh/blob/master/LICENCE">https://github.com/ranahanocka/point2mesh/blob/master/LICENCE</a></p>                                               |
|  | <p>Link: <a href="https://www.pinterest.com/pin/633881716295046979/">https://www.pinterest.com/pin/633881716295046979/</a><br/> License: Not Listed<br/> Credit: Good Housekeeping</p>                                                                                                                                                                                         |
|  | <p>Link: <a href="https://ip-adapter.github.io/">https://ip-adapter.github.io/</a><br/> Credit: Academic Paper: IP-Adapter: Text Compatible Image Prompt Adapter for Text-to-Image Diffusion Models<br/> License: No license provided</p>                                                                                                                                      |

|                                                                                     |                                                                                                                                                                                                                                                                                                      |
|-------------------------------------------------------------------------------------|------------------------------------------------------------------------------------------------------------------------------------------------------------------------------------------------------------------------------------------------------------------------------------------------------|
|    | <p>Link: <a href="https://basicwise.com/black-iron-wire-fruit-bowl-for-kitchen-counter-storage-basket-for-fruits-vegetables-and-bread/">https://basicwise.com/black-iron-wire-fruit-bowl-for-kitchen-counter-storage-basket-for-fruits-vegetables-and-bread/</a><br/> License/Credit: Not Listed</p> |
|    | <p>Link: <a href="https://www.worldatlas.com/animals/giraffe.html">https://www.worldatlas.com/animals/giraffe.html</a><br/> License: Not Listed<br/> Credit: worldatlas.com</p>                                                                                                                      |
|    | <p>Link: <a href="https://www.fast-growing-trees.com/products/victoria-red-grape">https://www.fast-growing-trees.com/products/victoria-red-grape</a><br/> License: Not Listed<br/> Credit: Fast Growing Trees</p>                                                                                    |
|  | <p>Link: <a href="https://generrated.com/prompts/lidar">https://generrated.com/prompts/lidar</a><br/> License: Generated Image<br/> Credit: Generrated</p>                                                                                                                                           |
|  | <p>Link: <a href="https://www.holidaycalendar.io/holiday/national-horse-day">https://www.holidaycalendar.io/holiday/national-horse-day</a><br/> License: Not Listed<br/> Credit: Holiday Calendar</p>                                                                                                |
|  | <p>Link: <a href="https://pixers.hk/posters/beautiful-mustang-horse-in-a-field-24162557">https://pixers.hk/posters/beautiful-mustang-horse-in-a-field-24162557</a><br/> License: Not Listed<br/> Credit: MAXFX</p>                                                                                   |

|                                                                                     |                                                                                                                                                                                                                                                                                            |
|-------------------------------------------------------------------------------------|--------------------------------------------------------------------------------------------------------------------------------------------------------------------------------------------------------------------------------------------------------------------------------------------|
|    | <p>Link: <a href="https://arxiv.org/abs/2312.07536">https://arxiv.org/abs/2312.07536</a><br/> Credit: Academic Paper: FreeControl: Training-Free Spatial Control of Any Text-to-Image Diffusion Model with Any Condition<br/> License: No license provided</p>                             |
|    | <p>Link: <a href="https://www.marthastewart.com/quiet-luxury-design-trend-8613172">https://www.marthastewart.com/quiet-luxury-design-trend-8613172</a><br/> Credit/License: Not Listed</p>                                                                                                 |
|    | <p>Link: <a href="https://www.whisperingpineshomestead.net/2021/09/autumn-in-the-victorian-living-room.html">https://www.whisperingpineshomestead.net/2021/09/autumn-in-the-victorian-living-room.html</a><br/> Credit: WHISPERING PINES HOMESTEAD<br/> License: Not Listed</p>            |
|  | <p>Link: <a href="https://roxannajaye.com/2023/11/08/victorian-dark-green-living-room-ideas/">https://roxannajaye.com/2023/11/08/victorian-dark-green-living-room-ideas/</a><br/> Credit/License: Not Listed</p>                                                                           |
|  | <p>Link: <a href="https://groups.csail.mit.edu/vision/datasets/ADE20K/">https://groups.csail.mit.edu/vision/datasets/ADE20K/</a><br/> Credit: Academic Paper Dataset: Scene Parsing through ADE20K Dataset<br/> License: CC BSD-3</p>                                                      |
|  | <p>Link: <a href="https://amass.is.tue.mpg.de/">https://amass.is.tue.mpg.de/</a><br/> Credit: Academic Paper Dataset: AMASS: Archive of Motion Capture As Surface Shapes<br/> License: <a href="https://amass.is.tue.mpg.de/license.html">https://amass.is.tue.mpg.de/license.html</a></p> |

|                                                                                     |                                                                                                                                                                                                                                                                                                                  |
|-------------------------------------------------------------------------------------|------------------------------------------------------------------------------------------------------------------------------------------------------------------------------------------------------------------------------------------------------------------------------------------------------------------|
| 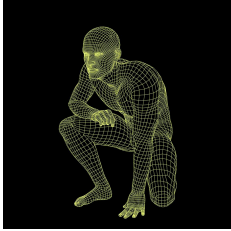   | <p>Link: <a href="https://www.vectorstock.com/royalty-free-vector/man-sitting-on-ground-wireframe-human-body-vector-29389118">https://www.vectorstock.com/royalty-free-vector/man-sitting-on-ground-wireframe-human-body-vector-29389118</a></p> <p>License: Standard License EULA</p> <p>Credit: Not Listed</p> |
|    | <p>Link: <a href="https://arxiv.org/pdf/2109.12674">https://arxiv.org/pdf/2109.12674</a></p> <p>Credit: Academic Paper: MetaDrive: an Open-source Driving Simulator for AI and Autonomy Research</p>                                                                                                             |
|    | <p>Link: <a href="https://www.interiorcompany.com/in/trends/simple-house-design">https://www.interiorcompany.com/in/trends/simple-house-design</a></p> <p>Credit/License: Not Listed</p>                                                                                                                         |
|  | <p>Link: <a href="https://free3d.com/3d-model/monkey-2-animated-4319.html">https://free3d.com/3d-model/monkey-2-animated-4319.html</a></p> <p>License: <a href="#">Royalty Free License</a></p> <p>Credit: abramsdesign</p>                                                                                      |
|  | <p>Link: <a href="https://www.pinterest.com/pin/high-mountain-everywhere-in-2023--41869471528452593/">https://www.pinterest.com/pin/high-mountain-everywhere-in-2023--41869471528452593/</a></p> <p>Credit: Everywhere Homes</p> <p>License: Not Listed</p>                                                      |
|  | <p>Link: <a href="https://cults3d.com/en/3d-model/home/low-poly-squirrel-rexer3d">https://cults3d.com/en/3d-model/home/low-poly-squirrel-rexer3d</a></p> <p>License: CC BY-NC - ATTRIBUTION - NON COMMERCIAL</p> <p>Credit: CULTS 3D</p>                                                                         |

|                                                                                     |                                                                                                                                                                                                                                                                                                                                                                                                                                                                                                          |
|-------------------------------------------------------------------------------------|----------------------------------------------------------------------------------------------------------------------------------------------------------------------------------------------------------------------------------------------------------------------------------------------------------------------------------------------------------------------------------------------------------------------------------------------------------------------------------------------------------|
|    | <p>Link: <a href="https://geoprofil.co/en/point-cloud/">https://geoprofil.co/en/point-cloud/</a><br/> Credit/License: Not Listed</p>                                                                                                                                                                                                                                                                                                                                                                     |
|    | <p>Link: <a href="https://www.istockphoto.com/vector/vector-outline-drawing-of-young-girl-sitting-on-park-bench-with-her-mobile-phone-gm1205780383-347482585">https://www.istockphoto.com/vector/vector-outline-drawing-of-young-girl-sitting-on-park-bench-with-her-mobile-phone-gm1205780383-347482585</a><br/> Credit: <a href="#">chronicler101</a><br/> License: iStock Standard License<br/> <a href="https://www.istockphoto.com/help/licenses">https://www.istockphoto.com/help/licenses</a></p> |
|    | <p>Link: <a href="https://www.pinterest.es/pin/54606214215978435/">https://www.pinterest.es/pin/54606214215978435/</a><br/> Credit/License: Not Listed</p>                                                                                                                                                                                                                                                                                                                                               |
|  | <p>Link: <a href="https://commons.wikimedia.org/wiki/File:Le_sacre_coeur.jpg">https://commons.wikimedia.org/wiki/File:Le_sacre_coeur.jpg</a><br/> License: <a href="#">CC BY-SA 3.0</a><br/> Credit: <a href="#">Tonchino</a></p>                                                                                                                                                                                                                                                                        |
|  | <p>Link: <a href="https://www.linkedin.com/posts/sam-goodman-69055525a_wwc-insights-parks-associates-says-the-wi-fi-activity-7128676645325991936-8jUY">https://www.linkedin.com/posts/sam-goodman-69055525a_wwc-insights-parks-associates-says-the-wi-fi-activity-7128676645325991936-8jUY</a><br/> Credit/License: Not Listed</p>                                                                                                                                                                       |
|  | <p>Link: <a href="https://www.four-paws.org/our-stories/publications-guides/awns-why-they-pose-a-danger-to-dogs">https://www.four-paws.org/our-stories/publications-guides/awns-why-they-pose-a-danger-to-dogs</a><br/> License: Not Listed<br/> Credit: VIER PFOTEN</p>                                                                                                                                                                                                                                 |



|                                                                                     |                                                                                                                                                                                                                                                                                                                                                                                                                                                      |
|-------------------------------------------------------------------------------------|------------------------------------------------------------------------------------------------------------------------------------------------------------------------------------------------------------------------------------------------------------------------------------------------------------------------------------------------------------------------------------------------------------------------------------------------------|
|    | <p>Link: <a href="https://www.businessinsider.com/elon-musk-house-sale-selling-california-mars-colony-spacex-2021-6">https://www.businessinsider.com/elon-musk-house-sale-selling-california-mars-colony-spacex-2021-6</a></p> <p>License: GETTY IMAGES CONTENT LICENSE AGREEMENT - NON COMMERCIAL</p> <p>Credit: Pool/Getty Images</p>                                                                                                              |
|    | <p>Link: <a href="https://commons.wikimedia.org/wiki/File:%E6%B8%85_%E9%83%8E%E4%B8%96%E5%AE%81%E7%BB%98%E3%80%8A%E6%B8%85%E9%AB%98%E5%AE%97%E4%B9%BE%E9%9A%86%E5%B8%9D%E6%9C%9D%E6%9C%8D%E5%83%8F%E3%80%8B.jpg">https://commons.wikimedia.org/wiki/File:%E6%B8%85_%E9%83%8E%E4%B8%96%E5%AE%81%E7%BB%98%E3%80%8A%E6%B8%85%E9%AB%98%E5%AE%97%E4%B9%BE%E9%9A%86%E5%B8%9D%E6%9C%9D%E6%9C%8D%E5%83%8F%E3%80%8B.jpg</a></p> <p>License: Public Domain</p> |
|    | <p>Link: <a href="https://www.etsy.com/listing/1452316748/traditional-chrysanthemum-chinese">https://www.etsy.com/listing/1452316748/traditional-chrysanthemum-chinese</a></p> <p>Credit/License: Not Listed</p>                                                                                                                                                                                                                                     |
|  | <p>Link: <a href="https://arxiv.org/abs/2302.05543">https://arxiv.org/abs/2302.05543</a></p> <p>Credit: Academic Paper: Adding Conditional Control to Text-to-Image Diffusion Models</p>                                                                                                                                                                                                                                                             |
|  | <p>Link: <a href="https://arxiv.org/abs/2311.03335">https://arxiv.org/abs/2311.03335</a></p> <p>Credit: Academic Paper: Cross-Image Attention for Zero-Shot Appearance Transfer</p>                                                                                                                                                                                                                                                                  |
|  | <p>Link: <a href="https://fineartamerica.com/featured/back-of-mindego-hill-stephanie-maclean.html?product=framed-print">https://fineartamerica.com/featured/back-of-mindego-hill-stephanie-maclean.html?product=framed-print</a></p> <p>License: Not Listed</p> <p>Credit: Stephanie Maclean</p>                                                                                                                                                     |

|                                                                                     |                                                                                                                                                                                                                                                                                                                                                   |
|-------------------------------------------------------------------------------------|---------------------------------------------------------------------------------------------------------------------------------------------------------------------------------------------------------------------------------------------------------------------------------------------------------------------------------------------------|
| 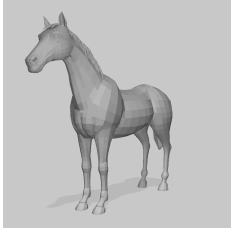   | <p>Link: <a href="https://free3d.com/3d-model/horse-779.html">https://free3d.com/3d-model/horse-779.html</a><br/> License: <a href="#">Royalty Free License</a><br/> Credit: ashishlko11</p>                                                                                                                                                      |
|    | <p>Link: <a href="https://www.shine.cn/feature/art-culture/2111218466/">https://www.shine.cn/feature/art-culture/2111218466/</a><br/> License: Not Listed<br/> Credit: Imaginechina</p>                                                                                                                                                           |
|    | <p>Link: <a href="https://www.1stdibs.com/art/paintings/landscape-paintings/pil-ho-lee-utah-horses-contemporary-impressionist-scene/id-a_8878292/">https://www.1stdibs.com/art/paintings/landscape-paintings/pil-ho-lee-utah-horses-contemporary-impressionist-scene/id-a_8878292/</a><br/> License: Not Listed<br/> Credit: Pil Ho Lee</p>       |
|  | <p>Link: <a href="https://www.instagram.com/p/B-IWM8LDRQT/">https://www.instagram.com/p/B-IWM8LDRQT/</a><br/> License: Not Listed<br/> Credit: leartesstudios</p>                                                                                                                                                                                 |
|  | <p>Link: <a href="https://www.vecteezy.com/photo/7135711-cute-baby-monkey-on-tree-in-forest-animal-conservation-and-protecting-ecosystems-concept">https://www.vecteezy.com/photo/7135711-cute-baby-monkey-on-tree-in-forest-animal-conservation-and-protecting-ecosystems-concept</a><br/> Credit: kasarp1968533984<br/> License: Not listed</p> |
|  | <p>Link: <a href="https://roxannajaye.com/2023/11/08/victorian-dark-green-living-room-ideas/">https://roxannajaye.com/2023/11/08/victorian-dark-green-living-room-ideas/</a><br/> Credit: Roxanna Jaye<br/> License: Not listed</p>                                                                                                               |



|                                                                                                    |                                                                                                                                                                                                                                                                                                                                                                                                                                                                                                                                                                                                                                                                                                                                                                                                                   |
|----------------------------------------------------------------------------------------------------|-------------------------------------------------------------------------------------------------------------------------------------------------------------------------------------------------------------------------------------------------------------------------------------------------------------------------------------------------------------------------------------------------------------------------------------------------------------------------------------------------------------------------------------------------------------------------------------------------------------------------------------------------------------------------------------------------------------------------------------------------------------------------------------------------------------------|
|                   | <p>Link: <a href="https://pnp-diffusion.github.io/">https://pnp-diffusion.github.io/</a><br/> Credit: Academic Paper Dataset: Plug-and-Play</p>                                                                                                                                                                                                                                                                                                                                                                                                                                                                                                                                                                                                                                                                   |
|                   | <p>Link: <a href="https://www.thesprucepets.com/dog-breed-profile-beagle-1117938">https://www.thesprucepets.com/dog-breed-profile-beagle-1117938</a><br/> Credit: Rolf Kopfle (Getty Images)<br/> License: Not listed</p>                                                                                                                                                                                                                                                                                                                                                                                                                                                                                                                                                                                         |
|  <p>(video)</p>   | <p>Link: <a href="https://rave-video.github.io/">https://rave-video.github.io/</a><br/> Credit: Academic Paper Dataset: RAVE: Randomized Noise Shuffling for Fast and Consistent Video Editing with Diffusion Models<br/> License: Not listed</p>                                                                                                                                                                                                                                                                                                                                                                                                                                                                                                                                                                 |
|  <p>(video)</p> | <p>Link: <a href="https://nypost.com/2023/12/05/news/tiger-kills-man-who-followed-predator-after-it-attacked-dog/">https://nypost.com/2023/12/05/news/tiger-kills-man-who-followed-predator-after-it-attacked-dog/</a><br/> Credit: Adobe Stock<br/> License: Not listed/Adobe standard license</p>                                                                                                                                                                                                                                                                                                                                                                                                                                                                                                               |
|  <p>(video)</p> | <p>Link: <a href="https://mcl.usc.edu/mcl-jcv-dataset/">https://mcl.usc.edu/mcl-jcv-dataset/</a><br/> Credit: Academic Paper Dataset: MCL-JCV: A JND-based H.264/AVC video quality assessment dataset<br/> License: Permission is hereby granted, free of charge, to any person obtaining a copy of the database and associated documentation files (the “MCL-JCV DATASET”), to deal in the database without restriction, including without limitation the rights to use, copy, modify, merge, publish, distribute, and/or sell copies of the MCL-JCV DATASET, and to permit persons to whom the dataset is furnished to do so, provided that the above copyright notice(s) and this paragraph and the following two paragraphs appear in all copies of the MCL-JCV DATABASE and in supporting documentation.</p> |

|                                                                                                   |                                                                                                                                                                                                                                                                                                                                                                                                                                                                                                                                                                                                                                                                                                                                                                                                                   |
|---------------------------------------------------------------------------------------------------|-------------------------------------------------------------------------------------------------------------------------------------------------------------------------------------------------------------------------------------------------------------------------------------------------------------------------------------------------------------------------------------------------------------------------------------------------------------------------------------------------------------------------------------------------------------------------------------------------------------------------------------------------------------------------------------------------------------------------------------------------------------------------------------------------------------------|
|  <p>(video)</p>  | <p>Link: <a href="https://mcl.usc.edu/mcl-jcv-dataset/">https://mcl.usc.edu/mcl-jcv-dataset/</a><br/> Credit: Academic Paper Dataset: MCL-JCV: A JND-based H.264/AVC video quality assessment dataset<br/> License: Permission is hereby granted, free of charge, to any person obtaining a copy of the database and associated documentation files (the "MCL-JCV DATASET"), to deal in the database without restriction, including without limitation the rights to use, copy, modify, merge, publish, distribute, and/or sell copies of the MCL-JCV DATASET, and to permit persons to whom the dataset is furnished to do so, provided that the above copyright notice(s) and this paragraph and the following two paragraphs appear in all copies of the MCL-JCV DATABASE and in supporting documentation.</p> |
|  <p>(video)</p>  | <p>Link: <a href="https://en.wikipedia.org/wiki/Bald_eagle#/media/File:Bald_eagle_about_to_fly_in_Alaska_(2016).jpg">https://en.wikipedia.org/wiki/Bald_eagle#/media/File:Bald_eagle_about_to_fly_in_Alaska_(2016).jpg</a><br/> Credit: Andy Morffew<br/> License: CC BY 2.0</p>                                                                                                                                                                                                                                                                                                                                                                                                                                                                                                                                  |
|  <p>(video)</p> | <p>Link: <a href="https://amass.is.tue.mpg.de/">https://amass.is.tue.mpg.de/</a><br/> Credit: Academic Paper Dataset: AMASS:<br/> Archive of Motion Capture As Surface Shapes<br/> License: <a href="https://amass.is.tue.mpg.de/license.html">https://amass.is.tue.mpg.de/license.html</a></p>                                                                                                                                                                                                                                                                                                                                                                                                                                                                                                                   |
